# Supplementary figures and images for: Correlation between Expression Profiles of Key Signaling Genes in Colorectal Cancer Samples from Type 2 Diabetic and Non-Diabetic Patients
Source: MDPI journal article supplement (doi:10.3390/life10090216), 2020-09-22

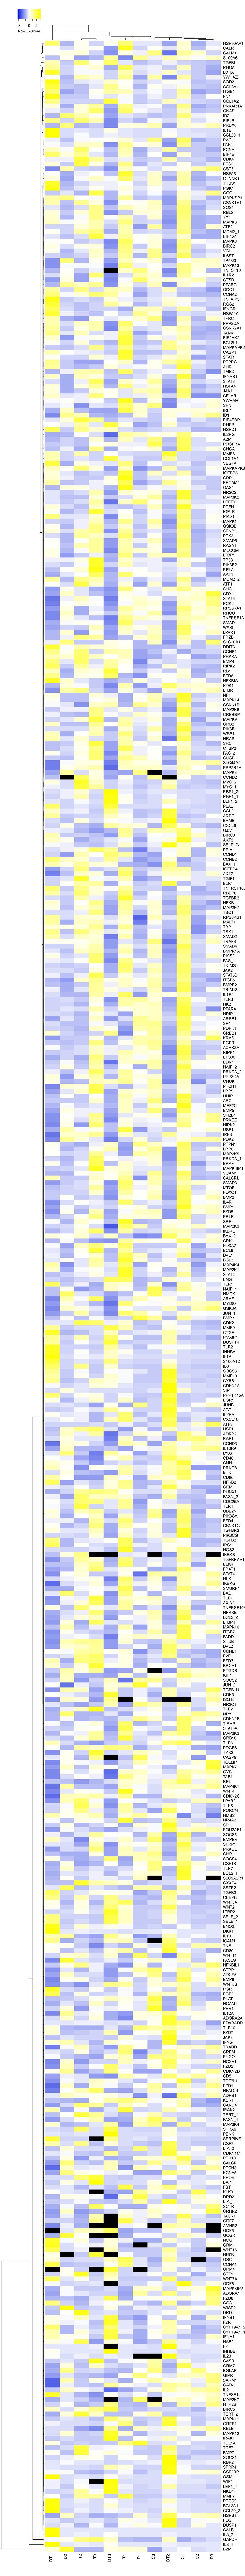

Supplement: s1 [file s1]

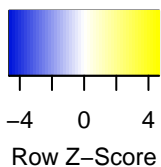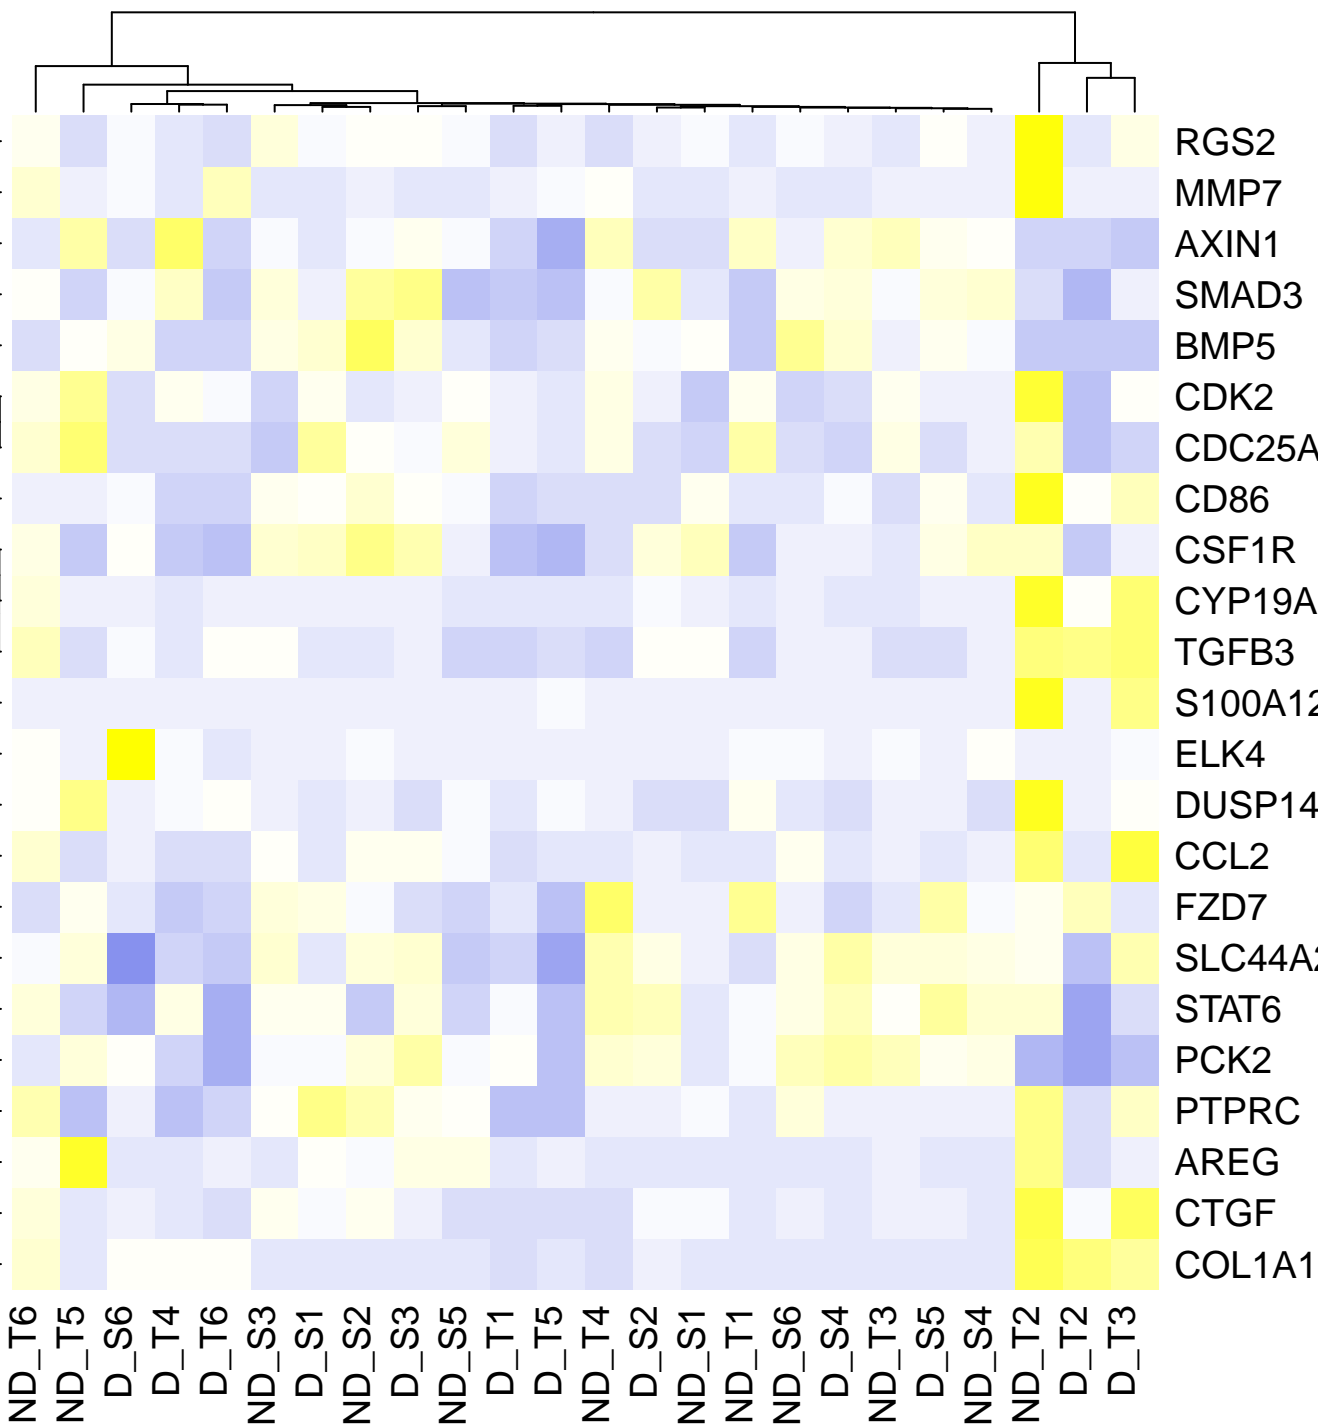

Supplement: s1 [file s1]
